# Supplementary material for: Reliability of pre-admission patient-reported outcome measures postoperatively assessed via proxies: a prospective, multicenter observational study
Source: Springer Nature journal article supplement (doi:10.1186/s13054-025-05431-6), 2025-05-19
Supplement: MOESM1 [file 13054_2025_5431_MOESM1_ESM.pdf]

## **Additional File 1**

### **Reliability of pre-admission Patient-reported Outcome Measures postoperatively assessed via Proxies: a prospective, multicenter observational study**

#### *Authors*

Julius J. Grunow<sup>1</sup> (0000-0003-4164-0138), Leonie Hartmann<sup>1</sup>, Bernhard Ulm<sup>2,3</sup>, Mathilde Maechler<sup>1</sup>, Manfred Blobner<sup>2,3</sup>, Katharina Seidenspinner<sup>4</sup>, Lukas Schoennagel<sup>1</sup>, Steffen Weber-Carstens<sup>1</sup>, Kristina Fuest<sup>3</sup>, Tobias Wollersheim<sup>1,+</sup>, Stefan J Schaller<sup>1,2,5,+</sup> (0000-0002-6683-9584)

+ These authors contributed equally.

#### *Affiliations*

1. Charité – Universitätsmedizin Berlin, corporate member of Freie Universität Berlin and Humboldt Universität zu Berlin, Department of Anaesthesiology and Intensive Care Medicine (CCM/CVK)
2. Technical University of Munich, School of Medicine and Health, Klinikum rechts der Isar, Department of Anaesthesiology and Intensive Care Medicine
3. University of Ulm, Faculty of Medicine, Department of Anesthesiology and Intensive Care Medicine, Ulm, Germany
4. Department of Cardiology, Vivantes Klinikum im Friedrichshain, Berlin, Germany
5. Medical University of Vienna, Department of Anaesthesia, Intensive Care Medicine and Pain Medicine, Division of General Anaesthesia and Intensive Care Medicine, Vienna, Austria

#### *Corresponding Author*

Univ.-Prof. Dr. med. Stefan J. Schaller

Charité – Universitätsmedizin Berlin

Department of Anaesthesiology and Intensive Care Medicine (CCM/CVK)

Chariteplatz 1

10117 Berlin

Germany

stefan.schaller@charite.de

## Table of Content

|                                                                                                                     |          |
|---------------------------------------------------------------------------------------------------------------------|----------|
| <b>TABLE OF CONTENT .....</b>                                                                                       | <b>2</b> |
| <b>SUPPLEMENTARY TABLES .....</b>                                                                                   | <b>3</b> |
| TABLE S1. PATIENT PROXY PAIRS WITH A DIFFERENCE OUTSIDE THE MCID .....                                              | 3        |
| TABLE S2. COHEN’S KAPPA FOR IADL .....                                                                              | 4        |
| TABLE S3. COHEN’S KAPPA FOR IADL WITHOUT IMPUTED VALUES .....                                                       | 5        |
| TABLE S4. PATIENT PROXY PAIRS WITH A DIFFERENCE OUTSIDE THE MCID ACCORDING TO HOUSEHOLD STATUS.....                 | 6        |
| TABLE S5. PATIENT PROXY PAIRS WITH A DIFFERENCE OUTSIDE THE MCID ACCORDING TO FREQUENCY OF VISITS .....             | 7        |
| <b>SUPPLEMENTARY FIGURES .....</b>                                                                                  | <b>8</b> |
| FIGURE S1. STUDY FLOW CHART .....                                                                                   | 8        |
| FIGURE S2. RELIABILITY FOR REGULAR WARD AND ICU IN BLAND-ALTMANN PLOTS FOR THE SF-36.....                           | 9        |
| FIGURE S3. RELIABILITY FOR REGULAR WARD AND ICU IN BLAND-ALTMANN PLOTS FOR WHODAS 2.0, BARTHEL-INDEX AND IADL. .... | 10       |

## Supplementary Tables

**Table S1. Patient Proxy Pairs with a Difference outside the MCID**

| Variable                       | Normal Ward (n = 102) | ICU (n = 102) | p-value |
|--------------------------------|-----------------------|---------------|---------|
| SF-36 Physical component scale | 41 (46%)              | 53 (58%)      | 0.14    |
| SF-36 Mental component scale   | 51 (57%)              | 59 (64%)      | 0.37    |
| WHODAS 2.0                     | 57 (56%)              | 78 (77%)      | 0.003   |
| EQ-5D-5L                       | 38 (39%)              | 45 (46%)      | 0.39    |
| Barthel-Index                  | 19 (20%)              | 20 (20%)      | 1.0     |

Shown is the number and percentage of patient-proxy pairs displaying a difference between the scores larger than the MCID. Normal ward and ICU patients were compared with the Chi-squared test.  
MCID, minimal clinically important difference

**Table S2. Cohen's Kappa for IADL**

| Variable                     | All                | Normal Ward        | ICU                | p-value |
|------------------------------|--------------------|--------------------|--------------------|---------|
| IADL unweighted <sup>#</sup> | 0.26 [0.18 – 0.35] | 0.25 [0.12 – 0.39] | 0.27 [0.16 – 0.37] | 0.93    |
| IADL weighted <sup>#</sup>   | 0.43 [0.33 – 0.52] | 0.41 [0.26 – 0.57] | 0.43 [0.32 – 0.55] | 0.89    |

<sup>#</sup> Cohens's Kappa weighted and unweighted with 95% confidence interval for Instrumental Activities of Daily Living

**Table S3. Cohen's Kappa for IADL without imputed values**

| Variable                     | All                | Normal Ward        | ICU                | p-value |
|------------------------------|--------------------|--------------------|--------------------|---------|
| IADL unweighted <sup>#</sup> | 0.29 [0.20 – 0.38] | 0.27 [0.15 – 0.39] | 0.30 [0.16 – 0.45] | 0.84    |
| IADL weighted <sup>#</sup>   | 0.48 [0.37 – 0.59] | 0.48 [0.34 – 0.62] | 0.47 [0.30 – 0.65] | 0.98    |

<sup>#</sup> Cohens's Kappa weighted and unweighted with 95% confidence interval for Instrumental Activities of Daily Living

**Table S4. Patient Proxy Pairs with a Difference outside the MCID according to Household Status**

| Shared Household               |              | Yes         | No         | Not Anymore | p-value |
|--------------------------------|--------------|-------------|------------|-------------|---------|
| Barthel Index                  | Inside MCID  | 110 (80.9%) | 10 (71.4%) | 35 (79.5%)  | 0.701   |
|                                | Outside MCID | 26 (19.1%)  | 4 (28.6%)  | 9 (20.5%)   |         |
| EQ-5D-5L                       | Inside MCID  | 84 (60.0%)  | 8 (61.5%)  | 22 (50.0%)  | 0.484   |
|                                | Outside MCID | 56 (40.0%)  | 5 (38.5%)  | 22 (50.0%)  |         |
| WHODAS 2.0                     | Inside MCID  | 47 (33.1)   | 6 (42.9%)  | 14 (30.4%)  | 0.688   |
|                                | Outside MCID | 95 (66.9%)  | 8 (57.1%)  | 32 (69.6%)  |         |
| SF-36 Physical component score | Inside MCID  | 60 (46.9%)  | 8 (66.7%)  | 19 (46.3%)  | 0.410   |
|                                | Outside MCID | 68 (53.1%)  | 4 (33.3%)  | 22 (53.7%)  |         |
| SF-36 Mental component score   | Inside MCID  | 51 (39.8%)  | 4 (33.3%)  | 16 (39.0%)  | 0.907   |
|                                | Outside MCID | 77 (60.2%)  | 8 (66.7%)  | 25 (61.0%)  |         |

Shown is the number and percentage of patient-proxy pairs displaying a difference between the scores larger or smaller than the MCID. Normal ward and ICU patients were compared with the Chi-squared test.

**Table S5. Patient Proxy Pairs with a Difference outside the MCID according to Frequency of Visits**

| Shared Household               |              | Daily       | Less than Daily | p-value |
|--------------------------------|--------------|-------------|-----------------|---------|
| Barthel Index                  | Inside MCID  | 115 (81.0%) | 40 (76.9)       | 0.548   |
|                                | Outside MCID | 27 (19.0%)  | 12 (23.1%)      |         |
| EQ-5D-5L                       | Inside MCID  | 85 (58.6%)  | 29 (55.8%)      | 0.745   |
|                                | Outside MCID | 60 (41.4%)  | 23 (44.2%)      |         |
| WHODAS 2.0                     | Inside MCID  | 50 (33.8%)  | 17 (31.5%)      | 0.866   |
|                                | Outside MCID | 98 (66.2%)  | 37 (68.5%)      |         |
| SF-36 Physical component score | Inside MCID  | 63 (47.4%)  | 24 (50.0%)      | 0.866   |
|                                | Outside MCID | 70 (52.6%)  | 24 (50.0%)      |         |
| SF-36 Mental component score   | Inside MCID  | 50 (37.6%)  | 21 (43.8%)      | 0.493   |
|                                | Outside MCID | 83 (62.4%)  | 27 (56.3%)      |         |

Shown is the number and percentage of patient-proxy pairs displaying a difference between the scores larger or smaller than the MCID. Normal ward and ICU patients were compared with the Chi-squared test.

## Supplementary Figures

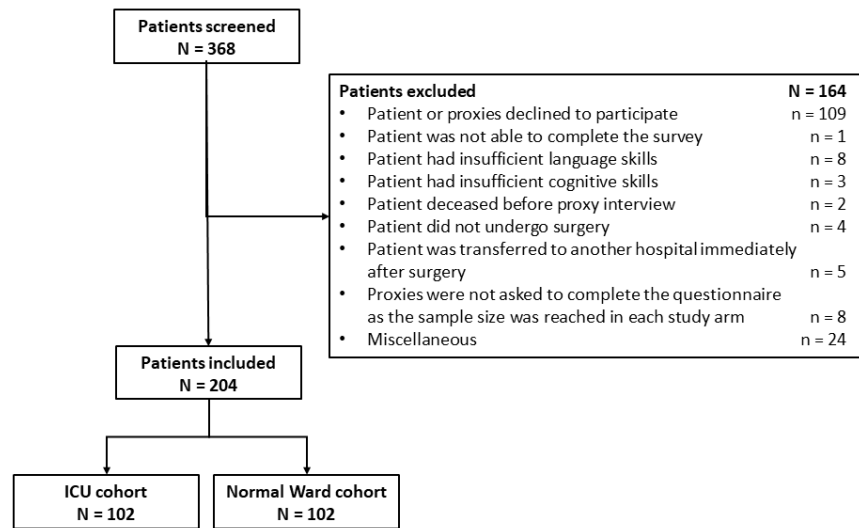

Figure S1. Study flow chart



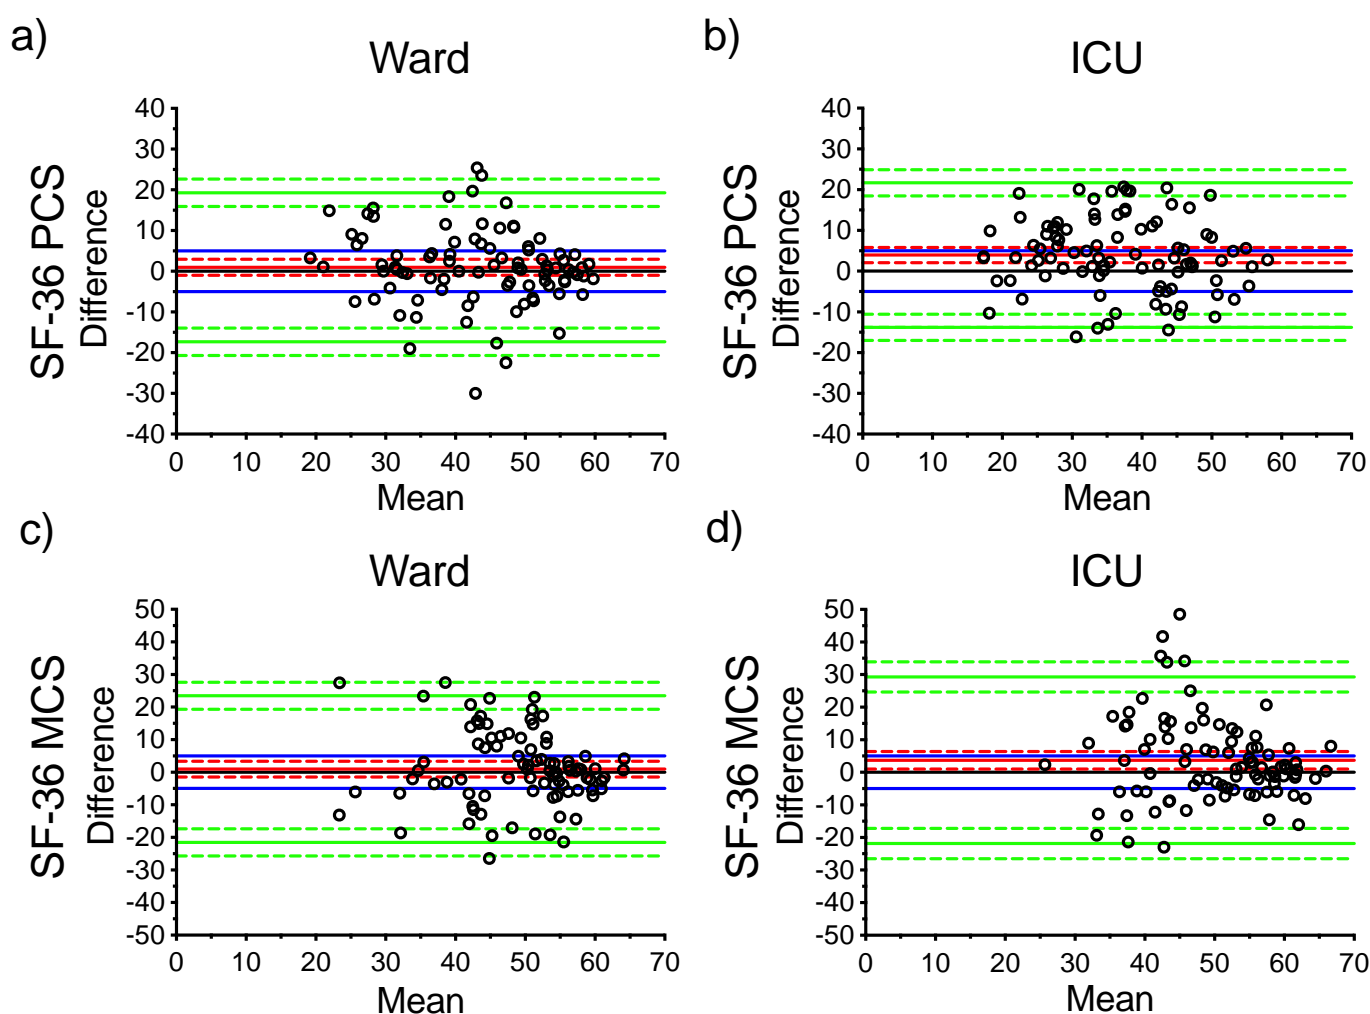

**Figure S2. Reliability for regular ward and ICU in Bland-Altman plots for the SF-36**

Shown is the difference in response between patients and proxies according to the mean value of their responses. The solid red line shows the mean difference, while the dashed red lines, in conjunction with the shaded red area, indicating the corresponding 95%CI. The solid blue lines and the corresponding shaded blue area indicate the range of the minimal clinically important difference (MCID). The solid green lines show the upper and lower limit of agreement together with the grey shaded area, while the dashed green lines in conjunction with the shaded green area demonstrate the 95%CI of the limits of agreement. The SF-36 showed insufficient reliability as the 95% limits of agreement for the a)/b) PCS and c)/d) MCS for the normal ward (PCS – mean difference [95% limits of agreement]: 0.97 [-17.33 – 19.28]; MCS - mean difference [95% limits of agreement]: 0.95 [-21.56 – 23.45]), and ICU (PCS – mean difference [95% limits of agreement]: 3.93 [-13.8 – 21.67]; MCS - mean difference [95% limits of agreement]: 3.68 [-21.89 – 29.25]) patients were outside the MCID. Normal ward patients demonstrated no bias (PCS – mean difference [95% CI]: 0.97 [-0.99 – 2.94]; MCS - mean difference [95%CI]: 0.95 [-1.47 – 3.36]). ICU patients showed a significant bias towards a worse evaluation by the proxies (PCS – mean difference [95% CI]: 3.93 [2.06 – 5.81]; MCS - mean difference [95%CI]: 3.68 [0.98 – 6.38]).

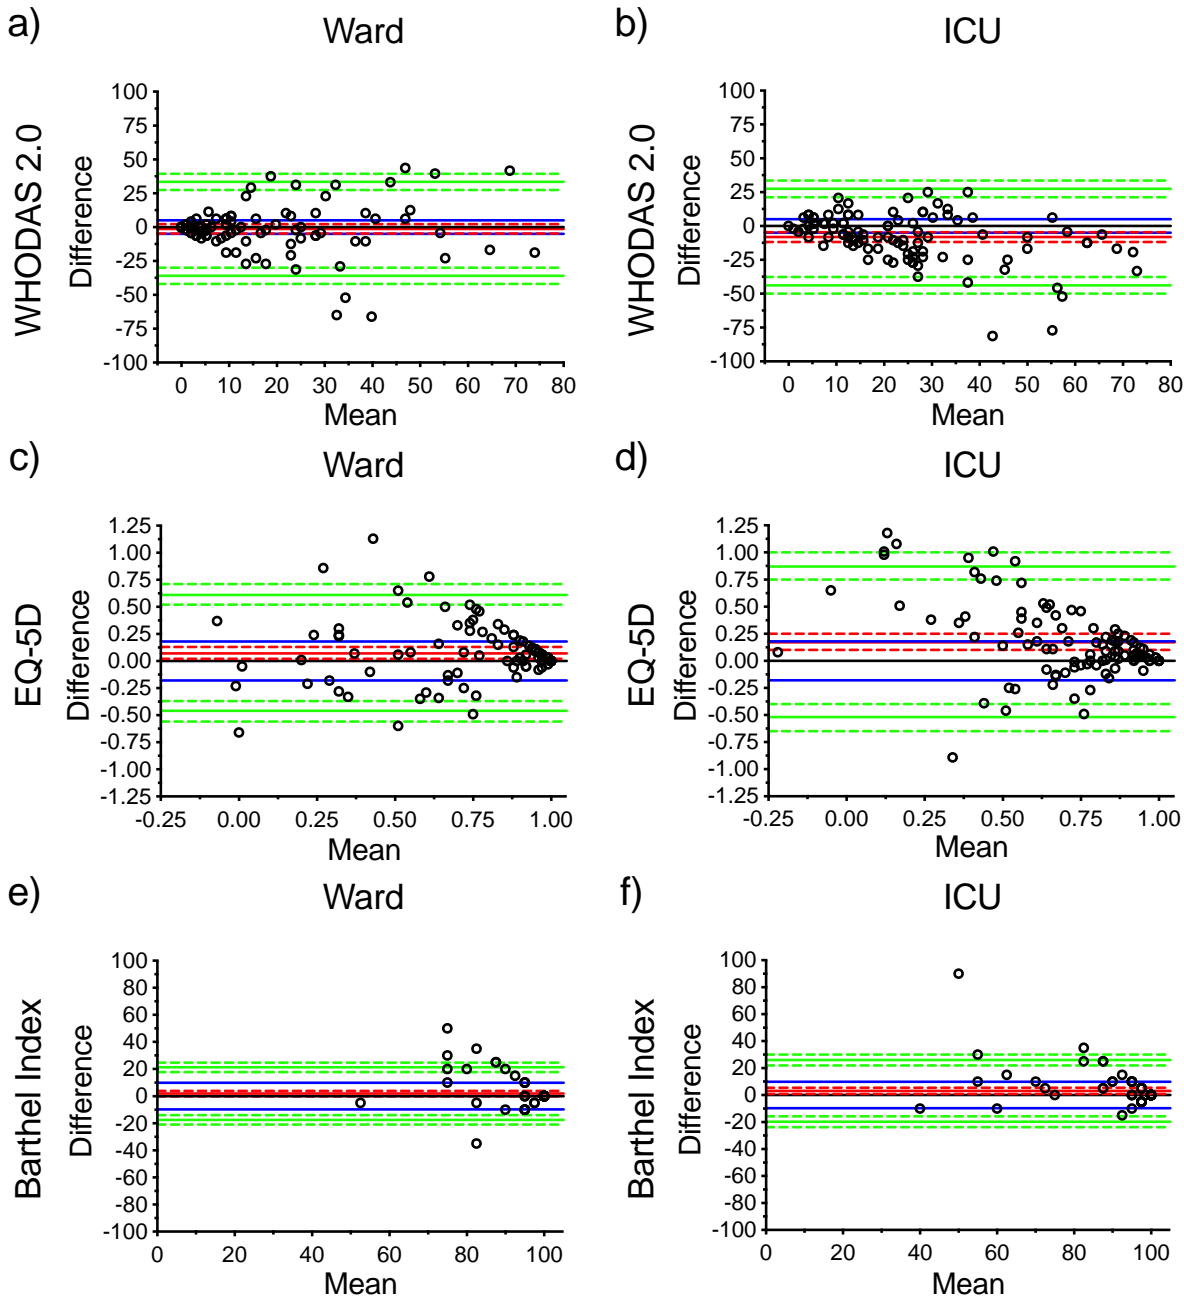

**Figure S3. Reliability for regular ward and ICU in Bland-Altman plots for WHODAS 2.0, Barthel-Index and IADL.**

Shown is the difference in response between patients and proxies according to the mean value of their responses. The solid red line shows the mean difference, while the dashed red lines, in conjunction with the shaded red area, indicate the corresponding 95%CI. The solid blue lines and the corresponding shaded blue area demonstrate the range of the minimal clinically important difference (MCID). The solid green lines indicate the upper and lower limit of agreement together with the grey-shaded area. In contrast, the dashed green lines in conjunction with the shaded green area show the 95%CI of the limits of agreement. The WHODAS 2.0 demonstrated an insufficient reliability as inside the 95% limits of agreement in the Bland-Altman plot for the a) regular ward (mean difference [95% limits of agreement]: -1.33 [-36.02 – 33.37]) and b) ICU (mean difference [95% limits of agreement]: -8.27 [-43.92 – 27.37]) were outside the MCID. ICU patients showed a significant bias towards a worse evaluation by the proxies (mean difference [95%CI]: -8.27 [-11.89 – -4.69]). Normal ward patients did not show a bias (mean difference [95%CI]: -1.33 [-4.82 – 2.17]). The EQ-5D results revealed insufficient reliability as the 95% limits of agreement (normal ward - mean difference [95% limits of agreement]: 0.07 [-0.46 – 0.61]; ICU - mean difference [95% limits of agreement]: 0.17 [-0.51 – 0.87]) are outside the MCID. A significant bias toward worse evaluation by the proxies was present in the c) regular ward (mean difference [95%CI]: 0.07 [0.02 – 0.13]) and d) ICU (mean difference [95%CI]: 0.17 [0.1 – 0.25]) cohort. The Barthel Index showed insufficient reliability as the 95% limits of agreement (normal ward – mean difference [95% limits of agreement]: 1.8 [-17.6 – 21.2]; ICU – mean difference [95% limits of agreement]: 3.1 [-19.8 – 26.0]) were outside the MCID. Only f) ICU but not in e) regular wards patients, a significant bias was present (regular ward - mean difference [95%CI]: 1.8 [-0.2 – 3.9]; ICU - mean difference [95%CI]: 3.1 [0.8 – 5.4]).
